# Supplementary material for: Modular synthesis and dielectric properties of high-performance fluorinated poly(arylene ether-1,3,4-oxadiazole)s
Source: Royal Society of Chemistry journal article supplement (doi:10.1039/c3py00174a), 2013-01-01
Supplement: c3py00174a.pdf [file c3py00174a.pdf]

## Supporting Information

### Modular Synthesis and Dielectric Properties of Fluorinated Poly(arylene ether-1,3,4-oxadiazole)s

Lin Cheng,<sup>1,2</sup> Kuo Han,<sup>1</sup> Kui Xu,<sup>1</sup> Matthew R. Gadinski,<sup>1</sup> and Qing Wang<sup>1</sup>,

<sup>1</sup> Department of Materials Science and Engineering, The Pennsylvania State University,  
University Park, PA 16802 <sup>2</sup> Department of Polymer Science and Materials, Huaqiao University,  
Xiamen, Fujian 361021, China

#### Materials

2,5-Bis(pentafluorophenyl)-1,3,4-oxadiazole (**FPOx**) was synthesized according to the literature procedure in reference 14. All other chemicals and solvents were commercially available from Aldrich and used as received unless otherwise noted.

#### General procedure for synthesis of monomer 1a-1h

The synthesis of monomers **1a-1h** was conducted in a similar approach, and a typical procedure for monomer **1c** was described as follows. In a 250 ml four-neck round bottom flask equipped with a mechanical stirrer, a condenser and a thermometer, 12.2 g (0.1 mol) of 2-ethylphenol was dissolved in 100 ml of 1,2-dichloroethane in the ice-water bath. Subsequently, 40.0 g (0.3 mol) of anhydrous aluminum chloride (anh. AlCl<sub>3</sub>) and 14.8 g (0.1 mol) of phthalic anhydride were added to the solution slowly in several portions. The resulting mixture was stirred intensively at room temperature for 2 h and 45 °C for another 2 h followed by being poured into hydrochloric acid (37.5 wt %, 50 ml) containing crushed ice. The coarse cream mixture was separated by steam distillation. After filtrated and dried, the coarse compound  $\gamma$ -ketone acid and about 100 ml 1-butanol was added into a 250 ml three-necked round bottom flask equipped with a mechanical stirred and a condenser. Then excessive hydrazine

monohydrate (30 ml, 85 wt %) was carefully dropped into the mixture when the solution was heated to reflux. The reaction was accomplished within 3 h and the white power product was obtained by filtration. The product was then purified by recrystallization in DMAc for at least two times followed by dried under vacuum at 80 °C for 24 h prior to polymerization.

#### **4-(4'-hydroxyphenyl) (2*H*)phthalazin-1-one (1a)**

White solid, yield based on two steps: 72%, mp: 309-310°C. <sup>1</sup>H NMR (400 MHz, DMSO-*d*<sub>6</sub>/TMS int, ppm) δ: 6.95(m, 2H, 2'-H), 7.42(m, 2H, 3'-H), 7.75(d, 1H, 5-H), 7.89(m, 2H, 6,7-H), 8.34(m, 1H, 8-H), 9.83(s, 1H, OH), 12.76(s, 1H, N-H), Elemental Analysis (%) Found (Calcd.): C: 70.37(70.58), H: 4.17(4.23), N: 11.63(11.76)

#### **4-(3'-methyl-4'-hydroxyphenyl) (2*H*)phthalazin-1-one (1b)**

White solid, yield based on two steps: 80 %, mp: 297-298°C. <sup>1</sup>H NMR (400 MHz, DMSO-*d*<sub>6</sub>/TMS int, ppm) δ: 2.21 (s, 3H, 30-CH<sub>3</sub>), 6.93 (d, 1H, 50-H), 7.22 (d, 1H, 60-H), 7.29 (s, 1H, 20-H), 7.75(m, 1H, 5-H), 7.88 (m, 2H, 6-,7-H), 8.32 (m, 1H, 8-H), 9.69 (s, 1H, O-H), 12.72 (s, 1H, N-H), Elemental Analysis (%) Found (Calcd.): C: 71.18(71.42), H: 4.67(4.79), N: 11.03(11.10)

#### **4-(3'-ethyl-4'-hydroxyphenyl) (2*H*)phthalazin-1-one (1c)**

White solid, yield based on two steps: 71 %, mp: 246-247 °C. <sup>1</sup>H NMR (400 MHz, DMSO-*d*<sub>6</sub>/TMS int, ppm) δ: 1.99 (t, 3H, 2'-CH<sub>3</sub>), 3.32(q, 2H, 2'-CH<sub>2</sub>), 6.73 (d, 1H, 2'-H), 6.77 (s, 1H, 5'-H), 7.10 (d, 1H, 6'-H), 7.27 (m, 1H, 5-H), 7.83 (m, 2H, 6-,7-H), 8.31(m, 1H, 8-H), 9.62 (s, 1H, O-H), 12.72 (s, 1H, N-H), Elemental Analysis (%) Found (Calcd.): C: 71.31(72.17), H: 5.08(5.30), N: 10.06(10.52)

#### **4-(3'-isopropyl-4'-hydroxyphenyl) (2*H*)phthalazin-1-one (2d)**

White solid, yield based on two steps: 82 %, mp: 281-282 °C. <sup>1</sup>H NMR (400 MHz, DMSO-*d*<sub>6</sub>/TMS int, ppm) δ: 1.21 (d, 6H, -CH<sub>3</sub>), 3.35(h, 1H, -CH(CH<sub>3</sub>)), 6.93 (d, 1H, 5'-H), 7.21 (s, 1H, 6'-H), 7.30 (d, 1H, 2'-H), 7.73 (m, 1H, 5-H), 7.86 (m, 2H, 6-,7-H), 8.31(m, 1H, 8-H), 9.72 (s, 1H, O-H), 12.74 (s, 1H, N-H), Elemental Analysis (%) Found (Calcd.): C: 71.80(72.84), H: 5.33(5.75), N: 8.71(9.99)

#### **4-(3'-phenyl-4'-hydroxyphenyl) (2*H*)phthalazin-1-one (1e)**

White solid, yield based on two steps: 85%, mp: 300-301°C. <sup>1</sup>H NMR (400 MHz, DMSO-*d*<sub>6</sub>/TMS int, ppm) δ: 7.11(d, 1H, Ar-H), 7.22-7.54(m, 6H, Ar-H), 7.62(d, 1H, Ar-H), 7.79-7.97(m, 3H, 5, 6, 7-H), 8.38(dd, 1H, 8-H), 8.82(s, 1H, O-*H*), 10.00(s, 1H, N-*H*), Elemental Analysis (%) Found (Calcd.): C: 75.37(76.42), H: 4.27(4.49), N: 7.97 (8.91)

#### **4-(3'-5'-dimethyl-4'-hydroxyphenyl) (2*H*)phthalazin-1-one (1f)**

White solid, yield based on two steps: 85%, mp: 280-281°C. <sup>1</sup>H NMR (400 MHz, DMSO-*d*<sub>6</sub>/TMS int, ppm) δ: 2.25 (s, 6H, 3'-,5'-CH<sub>3</sub>), 7.14 (s, 2H, 2'-,6'-H), 7.76 (m, 1H, 5-H), 7.88 (m, 2H, 6-,7-H), 8.32 (m, 1H, 8-H), 8.60 (s, 1H, O-*H*), 12.72 (s, 1H, N-*H*), Elemental Analysis (%) Found (Calcd.): C: 71.35(72.17), H: 4.68(5.30), N: 9.76(10.52)

#### **4-(2'-5'-dimethyl-4'-hydroxyphenyl) (2*H*)phthalazin-1-one (1g)**

White solid, yield based on two steps: 82%, mp: 288-289°C. <sup>1</sup>H NMR (400 MHz, DMSO-*d*<sub>6</sub>/TMS int, ppm) δ: 1.96(s, 3H, 2'-CH<sub>3</sub>), 2.14(s, 3H, 5'-CH<sub>3</sub>), 6.78(s, 1H, 3'-H), 7.00(s, 1H, 6'-H), 7.29(m, 1H, 5-H), 7.86(m, 2H, 6, 7-H), 8.32(dd, 1H, 8-H), 9.51(s, 1H, O-*H*), 12.72(s, 1H, N-*H*), Elemental Analysis (%) Found (Calcd.): C: 71.43(72.17), H: 4.79(5.30), N: 9.65(10.52)

#### **4-(4'-hydroxynaphthalenyl) (2*H*)phthalazin-1-one (1h)**

White solid, yield based on two steps: 65%, mp: 302-303°C. <sup>1</sup>H NMR (400 MHz, DMSO-*d*<sub>6</sub>/TMS int, ppm) δ: 7.02(d, 1H, 3'-H), 7.15(d, 1H, 5-H), 7.41(m, 3H, 2', 7', 8'-H), 7.49(m, 1H, 6'-H), 7.75(t, 1H, 6-H), 7.84(t, 1H, 7-H), 8.26(d, 1H, 5'-H), 8.37(d, 1H, 8-H), 10.55(s, 1H, O-*H*), 12.85(s, 1H, N-*H*), Elemental Analysis (%) Found (Calcd.): C: 73.95(74.99), H: 3.58(4.20), N: 8.74(9.72)

## General procedure for synthesis of polymer 2a-2h

A typical example of direct polycondensation of **FPOx** and monomer **1a** for polymer **2a** was shown as follows. A mixture of **FPOx** (0.402 g, 1.0 mmol), **1a** (0.238g, 1.0 mmol), an excess of anhydrous KF (4.0 mmol) and 5 mL of DMAc, was stirring at 25°C overnight. The obtained polymer solution was slowly poured into methanol (100 mL) with constant stirring, producing fibrous precipitate. The resultant polymer **2a** was washed thoroughly with hot water and then dissolved with chloroform and precipitated in methanol. The precipitate was collected and purified by re-dissolving in chloroform and re-precipitating in methanol for 3 times to obtain the polymer, and then dried at 100 °C under vacuum overnight.

**2a**, Yield: 96%, <sup>1</sup>H NMR (400 MHz, CDCl<sub>3</sub>/TMS int, ppm) δ: 7.08-8.00(m, 7H, Ar-*H*), 8.63(m, 1H, 8-*H*), <sup>19</sup>F NMR (400 MHz, CDCl<sub>3</sub>, ppm) δ: -135.58, -142.00, -151.30, Elemental Analysis (%) Found (Calcd.): C: 54.98(56.01), H: 1.12(1.34), N: 8.55(9.33)

**2b**, Yield: 97%, <sup>1</sup>H NMR (400 MHz, CDCl<sub>3</sub>/TMS int, ppm) δ: 2.67(s, 3H, CH<sub>3</sub>), 8.61(m, 1H, 8-*H*), 7.90-8.04(m, 3H, 5, 6, 7-*H*), 7.57(s, 1H, 2'-*H*), 7.41(d, 1H, 5'-*H*), 6.84(d, 1H, 6'-*H*), <sup>19</sup>F NMR (400 MHz, CDCl<sub>3</sub>, ppm) δ: -135.66, -142.20, -152.46, Elemental Analysis (%) Found (Calcd.): C: 55.75(56.69), H: 1.33(1.64), N: 8.74(9.12)

**2c**, yield: 91%. <sup>1</sup>H NMR (400 MHz, CDCl<sub>3</sub>/TMS int, ppm) δ: 1.40(t, 3H, CH<sub>3</sub>), 2.90(q, 2H, CH<sub>2</sub>), 6.80(d, 1H, 5'-*H*), 7.42(d, 1H, 6'-*H*), 7.58(s, 1H, 2'-*H*), 7.75-7.91(m, 3H, 5, 6, 7-*H*), 8.53(m, 1H, 8-*H*), <sup>19</sup>F NMR (400 MHz, CDCl<sub>3</sub>, ppm) δ: -135.77, -142.20, -152.28, Elemental Analysis (%) Found (Calcd.): C: 56.29(57.34), H: 1.09(1.92), N: 7.54(8.92)

**2d**, yield: 98%. <sup>1</sup>H NMR (400 MHz, CDCl<sub>3</sub>/TMS int, ppm) δ: 1.37(d, 6H, CH<sub>3</sub>), 3.58(h, 1H, CH(CH<sub>3</sub>)), 6.85(d, 1H, 5'-*H*), 7.42(d, 1H, 6'-*H*), 7.62(s, 1H, 2'-*H*), 7.81-7.91(m, 3H, 5, 6, 7-*H*), 8.65(m, 1H, 8-*H*), <sup>19</sup>F NMR (400 MHz, CDCl<sub>3</sub>, ppm) δ: -135.77, -142.17, -151.91, Elemental Analysis (%) Found (Calcd.): C: 56.91(57.95), H: 1.79(2.20), N: 7.74(8.72)

**2e**, yield: 96%. <sup>1</sup>H NMR (400 MHz, CDCl<sub>3</sub>/TMS int, ppm) δ: 6.10-8.10(m, 11H, Ar-*H*), 8.60(m, 1H, 8-*H*), <sup>19</sup>F NMR (400 MHz, CDCl<sub>3</sub>, ppm) δ: -135.87, -142.10, -152.25, Elemental Analysis (%) Found (Calcd.): C: 59.45(60.37), H: 1.08 (1.79), N: 7.15(8.28)

**2f**, yield: 95%. <sup>1</sup>H NMR (400 MHz, CDCl<sub>3</sub>/TMS int, ppm) δ: 2.35(s, 6H, CH<sub>3</sub>), 7.48(s, 2H, 2'-6'-*H*), 7.92-8.10(m, 3H, 5, 6, 7-*H*), 8.61(m, 1H, 8-*H*), <sup>19</sup>F NMR (400 MHz, CDCl<sub>3</sub>, ppm) δ: -135.95, -142.21, -156.79, Elemental Analysis (%) Found (Calcd.): C: 56.28(57.34), H:

1.21(1.92), N: 7.89(8.92)

**2g**, yield: 98%.  $^1\text{H}$  NMR (400 MHz,  $\text{CDCl}_3/\text{TMS}$  int, ppm)  $\delta$ : 2.16(s, 3H,  $\text{CH}_3$ ), 2.46(s, 1H,  $\text{CH}_3$ ), 6.91(s, 1H, 3'-H), 7.31(s, 1H, 5'-H), 7.45(m, 1H, 5-H), 7.91(m, 2H, 6, 7-H), 8.88(m, 1H, 8-H),  $^{19}\text{F}$  NMR (400 MHz,  $\text{CDCl}_3$ , ppm)  $\delta$ : -135.90, -141.60, -143.08, -152.23, Elemental Analysis (%) Found (Calcd.): C: 56.25(57.34), H: 1.10(1.92), N: 7.87(8.92)

**2h**, yield: 93%.  $^1\text{H}$  NMR (400 MHz,  $\text{CDCl}_3/\text{TMS}$  int, ppm)  $\delta$ : 6.85-7.89(m, 8H, Ar-H), 8.61(m, 1H, 7-H), 9.13(m, 1H, 8-H),  $^{19}\text{F}$  NMR (400 MHz,  $\text{CDCl}_3$ , ppm)  $\delta$ : -135.43, -141.86, -142.46, -151.65, Elemental Analysis (%) Found (Calcd.): C: 58.21(59.09), H: 1.04(1.55), N: 7.59(8.61)

## Measurements

FTIR was recorded with KBr pellets on Nicolet Nexus 670 FTIR spectrometer.  $^1\text{H}$  and  $^{19}\text{F}$  NMR spectra were recorded on Bruker AM-300 spectrometer instrument at room temperature using tetramethylsilane (TMS) and  $\text{CF}_3\text{Cl}$  as internal references, respectively. and dimethyl sulfoxide- $d_6$  ( $\text{DMSO}-d_6$ ) or chloroform ( $\text{CDCl}_3$ ) as solvent. DSC and TGA were performed on a TA Instrument Q100. Elemental analysis was carried out on a EURO EA3000 system. Inherent viscosities of **2a-2h** were measured in  $\text{CHCl}_3$  at 0.5g/dL concentration with an Ubbelohde viscometer at 30°C. Gel permeation chromatograms (GPC) using polystyrene as a standard were obtained on a Waters 1515 instrument with tetrahydrofuran (THF) as an eluent at a flow rate of 1.0 mL/min.

Dielectric properties were acquired using an Agilent LCR meter (E4980A) with 1.0 V bias. Temperature and frequency dependent of dielectric properties were measured using a Hewlett Packard 4284A LCR meter in conjunction with a Delta Design oven model 2300. Dielectric breakdown strength measurements were performed using the electrostatic pull-down method, with a 500 V/s ramp. A ball-shape upper contact to the sample electrode was used to avoid any mechanical damage from needle-shape contact. The voltage power supply from Trek has a maximum output of 30 KV. To avoid air breakdown, the samples were immersed in silicone oil during the test.

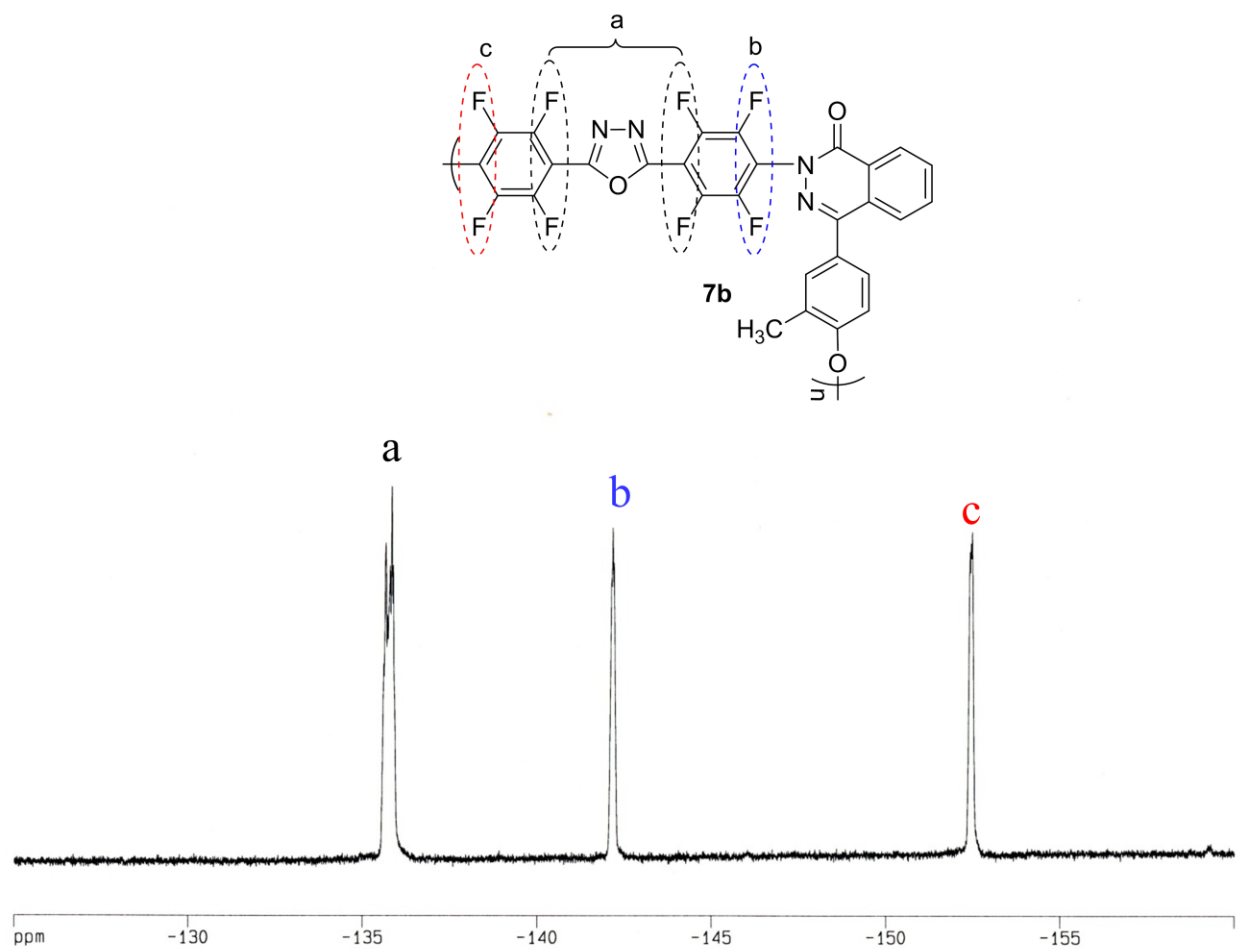

**Figure S1.**  $^{19}\text{F}$  NMR spectrum of polymer **2b**.

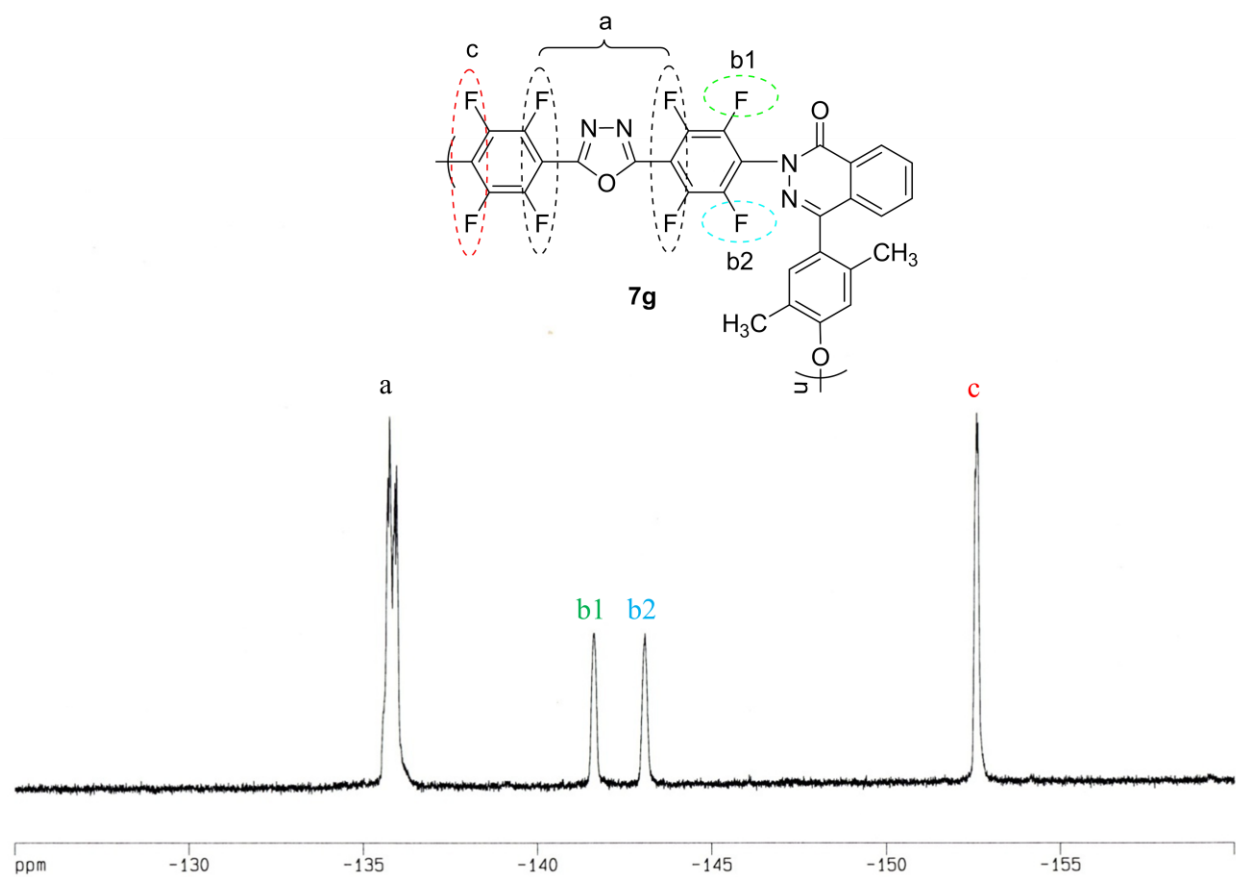

**Figure S2.**  $^{19}\text{F}$  NMR spectrum of polymer **2g**.

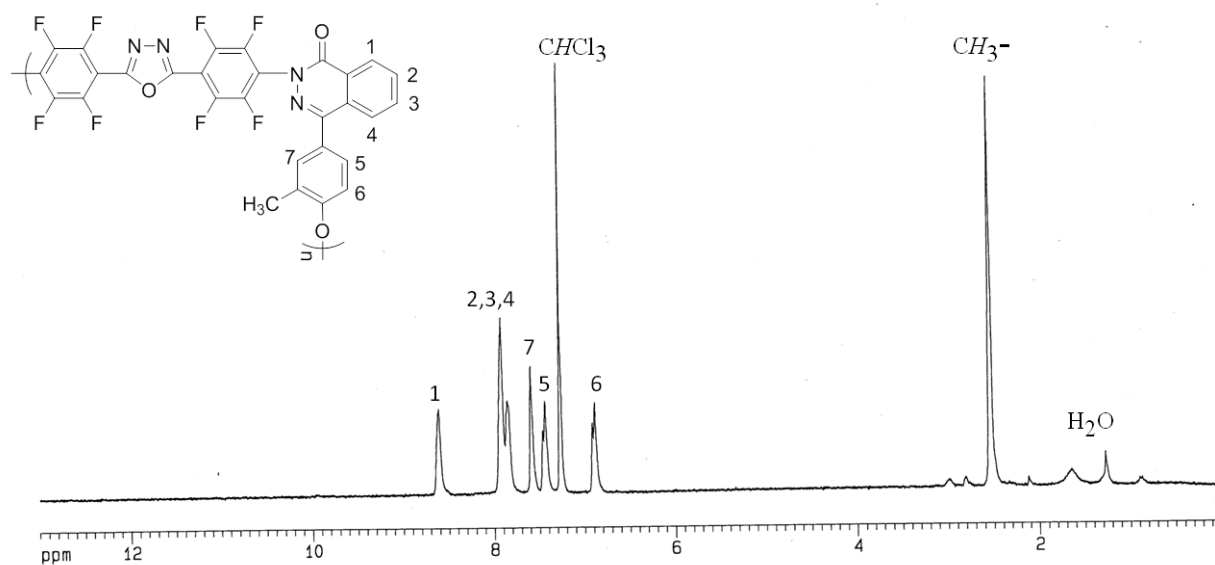

**Figure S3.**  $^1\text{H}$  NMR spectrum of polymer **2b**.

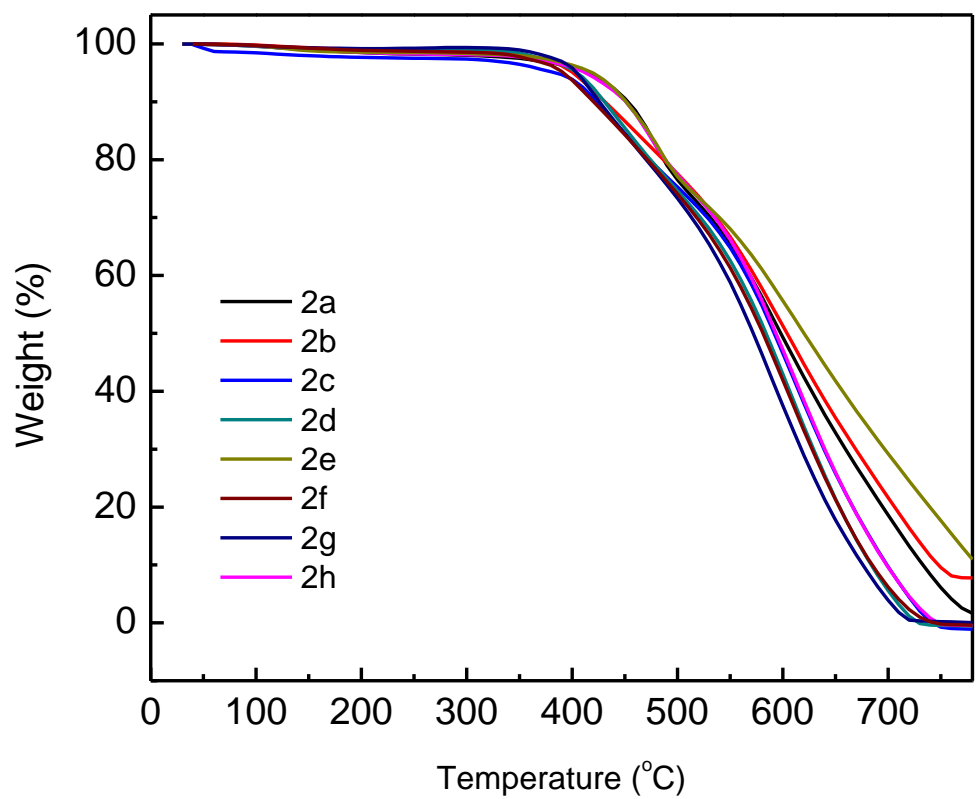

**Figure S4.** TGA curves of the polymers.

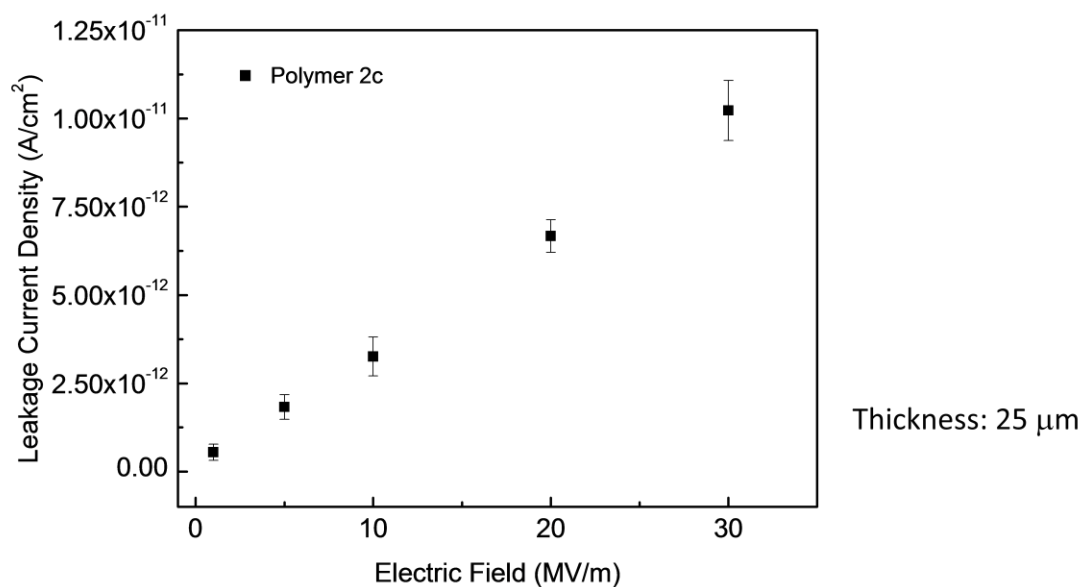

| Voltage (V)                                                  | 25            | 125            | 250            | 500            | 750             |
|--------------------------------------------------------------|---------------|----------------|----------------|----------------|-----------------|
| Leakage Current Density ( $10^{-13} \text{ A}/\text{cm}^2$ ) | $5.5 \pm 2.3$ | $18.3 \pm 3.5$ | $32.6 \pm 5.5$ | $66.7 \pm 4.6$ | $102.3 \pm 8.5$ |

**Figure S5.** Leakage current density of polymer **2c** at different fields.

**Table S1.** Molecular weights, intrinsic viscosities and thermal properties of the polymers.

| Polymer   | $\eta_{\text{inh}}$<br>(dL/g) | $M_n$<br>( $10^4$ ) | $M_w/M_n$ | $T_g$<br>(°C) | $T_d$<br>(°C) |
|-----------|-------------------------------|---------------------|-----------|---------------|---------------|
| <b>2a</b> | 0.69                          | 3.2                 | 1.95      | 306           | 452           |
| <b>2b</b> | 0.34                          | 2.8                 | 1.83      | 302           | 431           |
| <b>2c</b> | 0.41                          | 2.9                 | 1.71      | 314           | 423           |
| <b>2d</b> | 0.80                          | 7.8                 | 1.34      | 274           | 431           |
| <b>2e</b> | 0.53                          | 1.2                 | 1.53      | 271           | 451           |
| <b>2f</b> | 0.55                          | 1.4                 | 1.85      | 319           | 420           |
| <b>2g</b> | 0.79                          | 3.4                 | 2.04      | 288           | 426           |
| <b>2h</b> | 0.57                          | 1.4                 | 1.46      | 296           | 451           |

**Table S2.** Dielectric permittivity of the polymers.

| Polymer | $\epsilon'$ (@1KHz) |
|---------|---------------------|
| 2a      | 2.74                |
| 2b      | 3.19                |
| 2c      | 3.08                |
| 2d      | 3.09                |
| 2e      | 3.17                |
| 2f      | 2.97                |
| 2g      | 3.15                |
| 2h      | 3.04                |
